# Supplementary material for: Mathematical Modelling of the MAP Kinase Pathway Using Proteomic Datasets
Source: PLoS One. 2012 Aug 8;7(8):e42230. doi: 10.1371/journal.pone.0042230 (PMC3414524; doi:10.1371/journal.pone.0042230)
Supplement: Supporting Information S1 — Section 1. Chemical reactions. Section 2. Mathematical model. (DOCX) [file pone.0042230.s004.docx]

**Supplementary Information**

**Mathematical modelling of the MAP kinase pathway using proteomic datasets**

**Tianhai Tian and Jiangning Song**

**Section 1. Chemical reactions**

All the chemical reactions for the activation and dephosphorylation in the MAP kinase pathway are listed below. Kinase MEK is denoted for kinase in the cytosol, while N-MEK is located in the nucleus.

Ras + Raf Ras-Raf Ras + Raf*

Raf* + Raf-P’ase Raf*- Raf-P’ase Raf + Raf-P’ase

Raf* + MEK Raf*-MEK Raf* + MEKpp

MEKp+MEK-P’ase MEKp- MEK-P’ase MEK + MEK-P’ase

MEKpp+ MEK-P’ase MEKpp- MEK-P’ase MEKp + MEK-P’ase

MEKpp+ERKMEKpp-ERK MEKpp + ERKp

MEKpp+ERKp MEKpp-ERKp MEKpp + ERKpp

ERKp+ ERK-P’ase ERKp- ERK-P’ase ERK + ERK-P’ase

ERKpp+ ERK-P’ase ERKpp- ERK-P’ase ERKp + ERK-P’ase

N-MEKp+ MEK-P’ase N-MEKp- MEK-P’ase N-MEK + MEK-P’ase

N-MEKpp+ MEK-P’ase N-MEKpp- MEK-P’ase N-MEKp + MEK-P’ase

N-ERKp+ ERK-P’ase N-ERKp- ERK-P’ase N-ERK + ERK-P’ase

N-ERKpp+ ERK-P’ase N-ERKpp- ERK-P’ase N-ERKp + ERK-P’ase

N-MEKpp+N-ERK N-MEKpp-N-ERK N-MEKpp + N-ERKp

N-MEKpp+N-ERKp N-MEKpp-N-ERKp N-MEKpp + N-ERKpp

MEKpp N-MEKpp

ERKpp N-ERKpp

N-MEK MEK

N-ERK ERK

N-MEKpp MEKpp

N-ERKpp ERKpp

MEK N-MEK

ERK N-ERK

MEKp N-MEKp

N-MEKp MEKp

ERKp N-ERKp

N-ERKp ERKp

**Section 2. Mathematical model**

Based on the chemical reactions listed in Section 1, we developed a mathematical model of differential equations given by
